# Supplementary material for: The hippocampus supports deliberation during value-based decisions
Source: eLife. 2019 Jul 3;8:e46080. doi: 10.7554/eLife.46080 (PMC6693920; doi:10.7554/eLife.46080)
Supplement: Figure 2—source data 1. — κ is the drift rate. B0 is the initial height of the bound. Bdel is the delay before the bound starts decreasing. B2 is the coefficient of the exponential term that governs the bound decrease. tnd is the non-decision time. σtnd is the standard deviation of the non-decision time. μ0 is the bias in drift rate. Plaw is the coefficient of the power law applied to the stimulus strength (color coherence for perceptual and ∆Value for value-based). NLL is negative log-likelihood of the parameters given the choice and RT data. R2 choices is the McFadden pseudo-R2 for choice data given color coherence (for perceptual) or ∆Value (for value-based). R2 RT is the R2 for RT data given color coherence (for perceptual) or ∆Value (for value-based). [file elife-46080-fig2-data1.xlsx]

## Sheet: Supplementary_Table1.csv
	Participant #	κ	B0	Bdel	B2	tnd	σtnd	μ0	Plaw	NLL	R2 choices	R2 RT
Perceptual Decisions	ALL	2.07598	1.06196	0.469951	0.593178	0.419471	0.0381275	-0.116119	0.7733	50879.2	0.4225	0.192294
	Y01	2.30426	1.03355	0.786122	0.786331	0.438777	0.0465736	-0.199222	0.787041	1596.92	0.4717	0.259074
	Y02	4.4511	1.21307	0.414437	2.06599	0.388332	0.0414255	-0.302988	0.801177	1538.29	0.6617	0.346881
	Y03	5.90123	0.837236	0.950535	1.04914	0.644476	0.142915	-0.0627059	1.15182	1662.12	0.5618	0.271184
	Y04	1.89283	0.671869	0.692006	1.05424	0.595338	0.0714385	0.0564282	0.826552	1672.62	0.3106	0.122677
	Y05	2.25665	0.526921	2.52315	0.559073	0.500169	0.0425095	0.22658	0.846657	1585.52	0.3885	0.0597896
	Y06	2.98329	1.14788	0.517677	1.43146	0.429517	0.00638894	-0.0396285	0.831351	1642.88	0.404	0.439128
	Y07	5.89693	0.857266	0.262995	2.46899	0.529099	0.0739531	0.0292852	1.04722	1536.25	0.5362	0.401531
	Y08	2.3196	0.850327	0.440136	0.932506	0.536265	0.0171347	0.111158	0.836752	1638.9	0.5009	0.180426
	Y09	3.10654	1.06127	1.32057	2.4175	0.566801	0.00207793	-0.260372	0.734726	1654.41	0.5772	0.304995
	Y10	2.69788	1.30064	0.75902	1.32879	0.532684	0.0822385	-0.186155	0.840978	1671.78	0.5709	0.345767
	Y11	2.99386	1.20948	0.508075	0.998124	0.39374	0.00477437	0.119094	0.854517	1643.52	0.5099	0.392109
	Y12	3.25755	1.10079	0.557802	0.490197	0.459267	0.00327337	-0.347503	0.810652	1617.93	0.5993	0.274016
	Y13	4.77316	0.544024	3.14509	0.622248	0.531011	0.0528067	-0.503109	0.620253	1491.64	0.5488	0.106841
	Y14	3.45232	1.4888	0.583475	1.17104	0.544804	0.0948267	-0.054452	0.939863	1666.86	0.4898	0.450526
	Y15	2.31303	1.03183	1.30123	1.4845	0.393909	0.00102057	0.170954	0.793997	1671.39	0.6137	0.177426
	Y16	2.8983	1.30857	0.567309	1.02573	0.444001	0.0497742	-0.159469	0.79792	1662.57	0.5067	0.416422
	Y17	2.31874	1.2735	0.711553	1.48198	0.379549	0.00691972	-0.283667	0.681986	1706.11	0.3491	0.243343
	Y18	2.50075	0.976602	1.11677	1.62194	0.53394	0.0513108	-0.288511	0.843899	1644.67	0.4562	0.286482
	Y19	2.99398	1.11996	0.507923	1.12641	0.391682	0.00154918	-0.318028	0.727362	1607.63	0.5208	0.246176
	Y20	2.59408	1.29057	1.07474	1.62216	0.486423	0.00544119	-0.0756363	0.815267	1696.64	0.5597	0.349248
	Y21	1.20204	0.8272	0.920414	0.618267	0.535865	0.0379348	-0.247671	0.992268	1643.94	0.247	0.0568792
	Y22	2.6121	1.36421	0.65832	1.06799	0.391063	0.00565427	-0.179421	0.82867	1641.64	0.5732	0.453166
	Y23	1.60492	0.804092	1.14025	2.74342	0.48105	0.047487	0.313116	0.806045	1627.51	0.409	0.0474463
	Y24	1.2736	1.01427	0.452174	0.978754	0.627233	0.0472313	0.326921	0.891057	1715.1	0.3068	0.133742
	Y25	2.05052	0.751509	1.19258	2.1472	0.569313	0.1315	-0.180342	0.734443	1727.8	0.4246	0.0561431
	Y26	2.87747	1.04412	0.408659	0.90111	0.654809	0.137186	-0.00837019	0.744571	1688.56	0.4671	0.229404
	Y27	1.66164	1.31596	0.0111486	0.583267	0.591424	0.186202	-0.0573592	0.678536	1613.42	0.2742	0.0710023
	Y28	2.1992	1.66917	0.801745	1.42053	0.33734	0.00100003	-0.054492	0.76943	1701.94	0.5319	0.281626
	Y29	1.5775	1.03103	0.634653	0.734457	0.474911	0.0323253	-0.225979	1.27431	1706.51	0.4512	0.154108
	Y30	3.63915	1.15727	0.505131	0.976395	0.574579	0.108778	0.0389021	0.842964	1683.66	0.5204	0.34906
Value-based Decisions	ALL	1.07411	0.876234	0.440488	0.285221	0.628009	0.14873	0.0015207	0.878496	54129.4	0.128	0.0237901
	Y01	1.70836	0.853839	0.606264	0.409232	0.759853	0.176346	0.0239651	0.753429	1789	0.2045	0.0772018
	Y02	1.59081	0.61986	0.160844	0.507016	0.720976	0.105926	-0.170011	0.828002	1712.82	0.08581	0.0566662
	Y03	0.663846	1.00249	0.366744	0.406758	0.778471	0.0901027	-0.188979	1.14794	1822.62	0.1349	0.000146591
	Y04	1.06756	0.85603	1.92683	2.99994	0.51699	0.159598	0.0386056	0.905327	1789.53	0.142	0.0496196
	Y05	0.709075	0.579762	1.14375	1.19922	0.582376	0.0694781	0.142104	1.13707	1710.6	0.1276	0.0177779
	Y06	0.8147	0.703752	0.176411	1.09153	0.823836	0.0881041	-0.196335	1.04693	1694.36	0.06445	0.0836991
	Y07	1.0108	0.458428	1.07118	0.3447	0.630542	0.0659699	-0.185073	0.730122	1649.64	0.03233	0.000373026
	Y08	1.64368	0.795442	1.46644	1.34507	0.630553	0.0385509	0.0151975	1.15608	1801.82	0.02203	0.0289345
	Y09	1.29319	0.823105	0.075502	0.370592	0.633899	0.148369	0.149859	0.776808	1788.91	0.04679	0.0117975
	Y10	1.60966	0.888111	1.03862	1.11985	0.875076	0.135314	-0.0328005	0.725567	1802.01	0.1735	0.0283831
	Y11	2.23922	1.47098	1.18504	1.29859	0.440073	0.00312621	-0.0175481	1.21583	1803.41	0.2405	0.148322
	Y12	1.35236	0.836362	0.565627	0.635584	0.59558	0.0334929	0.0703283	0.821372	1757.68	0.215	0.0154346
	Y13	2.15445	1.08015	0.258347	0.669537	0.697511	0.0360873	0.0366018	0.836129	1755.92	0.2752	0.071208
	Y14	0.793623	1.00304	0.0476303	0.519129	0.814446	0.199913	-0.281803	0.805454	1787.96	0.07467	0.0208981
	Y15	0.758078	0.842176	2.10319	2.61322	0.566306	0.0778902	-0.150924	1.26455	1742.48	0.134	0.0270391
	Y16	1.30498	1.24425	0.371263	0.486371	0.708105	0.196259	-0.103574	0.630837	1772.82	0.1839	0.0309125
	Y17	1.40561	0.77015	0.375434	0.253163	0.754665	0.12757	0.158002	0.885624	1791.7	0.1677	0.0163852
	Y18	2.00687	0.964971	0.673933	0.407613	0.638457	0.0384644	-0.0522042	1.29946	1773.53	0.09255	0.0107731
	Y19	1.28586	0.800068	0.989888	0.726485	0.573436	0.0763324	0.180527	1.22626	1794.94	0.1247	0.028073
	Y20	0.857295	1.27764	0.332919	0.537707	0.631572	0.0912774	-0.0670273	1.26348	1798.79	0.1564	0.028571
	Y21	0.904948	0.590172	1.49913	1.27608	0.551694	0.0882913	-0.191356	0.845097	1686.7	0.1254	0.0308502
	Y22	1.47042	0.730843	0.0290378	0.287407	0.888006	0.162083	-0.00982873	0.906388	1764.2	0.1322	0.017579
	Y23	1.19575	0.74947	1.42747	1.4061	0.530789	0.0871938	0.00799036	0.819674	1756.52	0.1434	0.0841101
	Y24	3.88958	0.628575	0.419964	0.925675	0.657402	0.069086	0.027412	1.25709	1704.25	0.1025	0.150458
	Y25	1.47487	0.851671	1.10818	0.52455	0.710839	0.150118	0.040757	0.821017	1783.27	0.2368	0.0862298
	Y26	1.30333	1.88587	0.338657	0.816202	0.505998	0.0210404	0.00799317	0.963964	1772.17	0.2652	0.0860431
	Y27	1.16921	0.841027	0.738608	0.358816	0.834814	0.18552	-0.227556	0.75586	1628.57	0.1337	0.010529
	Y28	2.21256	0.870017	0.561907	0.807721	0.587326	0.00321662	-0.144763	0.753836	1779.8	0.104	0.0406466
	Y29	1.97539	1.18907	0.162626	0.466923	0.541815	0.0011002	0.0202601	0.833876	1793.2	0.1837	0.0913027
	Y30	1.30293	0.70687	1.321	0.742997	0.970421	0.18284	-0.215136	0.899964	1781.97	0.1849	0.0184928
