# Supplementary material for: The hippocampus supports deliberation during value-based decisions
Source: eLife. 2019 Jul 3;8:e46080. doi: 10.7554/eLife.46080 (PMC6693920; doi:10.7554/eLife.46080)
Supplement: Figure 3—source data 1. [file elife-46080-fig3-data1.xlsx]

## Sheet: model001_task003_cope14_table
Cluster #	Region	# voxels in region	# voxels in cluster	x	y	z	peak Z
1	L Lateral Occipital Cortex, superoir division	2992	35963	-36	-78	44	6
	L Frontal Pole	2729
	L Middle Frontal Gyrus	1860
	R Precuneous Cortex	1791
	R Lateral Occipital Cortex, superoir division	1789
	L Precuneous Cortex	1604
	L Frontal Orbital Cortex	1057
	R Cingulate Gyrus, posterior division	1025
	L Superior Frontal Gyrus	863
	L Paracingulate Gyrus	860
	L Cingulate Gyrus, posterior division	860
	Left Thalamus	759
	L Angular Gyrus	623
	L Supramarginal Gyrus, posterior division	540
	Brain-Stem	456
	L Lingual Gyrus	422
	L Superior Parietal Lobule	416
	Left Caudate	383
	L Inferior Frontal Gyrus, pars triangularis	357
	Right Thalamus	355
	L Intracalcarine Cortex	322
	Right Caudate	294
	L Cingulate Gyrus, anterior division	289
	L Inferior Frontal Gyrus, pars opercularis	275
	Left Hippocampus	265
	R Lingual Gyrus	245
	L Frontal Operculum Cortex	231
	R Paracingulate Gyrus	227
	L Precentral Gyrus	216
	R Intracalcarine Cortex	208
	L Insular Cortex	197
	L Cuneal Cortex	197
	R Cuneal Cortex	197
	L Postcentral Gyrus	192
	R Cingulate Gyrus, anterior division	189
	R Superior Parietal Lobule	171
	R Superior Frontal Gyrus	169
	R Angular Gyrus	168
	R Supramarginal Gyrus, posterior division	164
	L Subcallosal Cortex	112
	R Frontal Pole	91
	L Supramarginal Gyrus, anterior division	89
	L Temporal Fusiform Cortex, posterior division	87
	L Temporal Pole	86
	R Juxtapositional Lobule Cortex	80
	L Juxtapositional Lobule Cortex	78
	L Parahippocampal Gyrus, posterior division	77
	Left Accumbens	76
	R Frontal Orbital Cortex	73
	L Occipital Pole	62
	L Frontal Medial Cortex	59
	R Subcallosal Cortex	56
	Right Hippocampus	56
	L Supracalcarine Cortex	54
	R Supracalcarine Cortex	45
	Left Pallidum	24
	Right Accumbens	22
	R Parahippocampal Gyrus, posterior division	16
	Left Putamen	12
	L Central Opercular Cortex	11
2	L Middle Temporal Gyrus, posterior division	893	2038	-66	-26	-4	5.6
	L Inferior Temporal Gyrus, temporooccipital part	259
	L Middle Temporal Gyrus, temporooccipital part	246
	L Superior Temporal Gyrus, posterior division	239
	L Lateral Occipital Cortex, inferior division	50
	L Inferior Temporal Gyrus, posterior division	43
	L Middle Temporal Gyrus, anterior division	42
	L Superior Temporal Gyrus, anterior division	21
3	R Middle Frontal Gyrus	512	705	40	10	50	3.73
	R Precentral Gyrus	65
	R Inferior Frontal Gyrus, pars opercularis	13
4	R Middle Temporal Gyrus, posterior division	471	693	70	-18	-14	3.58
	R Middle Temporal Gyrus, temporooccipital part	53
	R Superior Temporal Gyrus, posterior division	26
	R Inferior Temporal Gyrus, temporooccipital part	15
5	R Lingual Gyrus	31	684	12	-64	-14	3.96
6	R Frontal Pole	183	661	56	20	4	3.65
	R Inferior Frontal Gyrus, pars triangularis	92
	R Frontal Orbital Cortex	84
	R Insular Cortex	82
	R Inferior Frontal Gyrus, pars opercularis	38
	R Frontal Operculum Cortex	28
	R Temporal Pole	15
