# Supplementary material for: The hippocampus supports deliberation during value-based decisions
Source: eLife. 2019 Jul 3;8:e46080. doi: 10.7554/eLife.46080 (PMC6693920; doi:10.7554/eLife.46080)
Supplement: Figure 3—source data 2. [file elife-46080-fig3-data2.xlsx]

## Sheet: model002t1c2vt2c2_conj_model001
Cluster #	Region	# voxels in region	# voxels in cluster	x	y	z	peak Z
1	L Middle Frontal Gyrus	345	514	-42	30	10	4.08
	L Inferior Frontal Gyrus, pars triangularis	93
	L Inferior Frontal Gyrus, pars opercularis	11
2	R Precuneous Cortex	260	382	20	-66	24	4.61
	R Intracalcarine Cortex	29
	R Supracalcarine Cortex	19
	R Cuneal Cortex	16
3	L Precuneous Cortex	169	347	-14	-68	12	4.75
	L Intracalcarine Cortex	65
	L Supracalcarine Cortex	32
	L Cuneal Cortex	27
4	L Intracalcarine Cortex	73	172	-8	-82	4	3.5
	L Lingual Gyrus	56
5	L Temporal Fusiform Cortex, posterior division	63	89	-34	-42	-22	3.72
	Left Hippocampus	14
6	Left Hippocampus	29	68	-18	-32	-2	4.22
	Left Thalamus	19
