# Supplementary material for: The hippocampus supports deliberation during value-based decisions
Source: eLife. 2019 Jul 3;8:e46080. doi: 10.7554/eLife.46080 (PMC6693920; doi:10.7554/eLife.46080)
Supplement: Figure 3—source data 3. [file elife-46080-fig3-data3.xlsx]

## Sheet: Supplementary_Table4
Cluster #	Region	# voxels in region	# voxels in cluster	x	y	z	peak Z
1	R Lateral Occipital Cortex, superoir division	3635	53545	10	-80	4	7.96
	L Lateral Occipital Cortex, superoir division	3277
	R Lingual Gyrus	1777
	R Occipital Pole	1765
	L Middle Frontal Gyrus	1660
	L Occipital Pole	1640
	L Lingual Gyrus	1405
	R Precuneous Cortex	1322
	L Lateral Occipital Cortex, inferior division	1268
	R Lateral Occipital Cortex, inferior division	1211
	L Precentral Gyrus	1013
	L Occipital Fusiform Gyrus	926
	R Occipital Fusiform Gyrus	880
	Left Thalamus	820
	R Temporal Occipital Fusiform Cortex	796
	R Intracalcarine Cortex	770
	R Cuneal Cortex	725
	L Superior Frontal Gyrus	710
	L Precuneous Cortex	680
	L Temporal Occipital Fusiform Cortex	648
	L Intracalcarine Cortex	631
	Left Hippocampus	619
	Right Thalamus	612
	L Frontal Pole	580
	L Superior Parietal Lobule	568
	L Temporal Fusiform Cortex, posterior division	545
	L Inferior Temporal Gyrus, temporooccipital part	489
	L Cuneal Cortex	486
	Brain-Stem	466
	Right Hippocampus	463
	R Cingulate Gyrus, posterior division	403
	R Inferior Temporal Gyrus, temporooccipital part	354
	L Cingulate Gyrus, posterior division	304
	L Paracingulate Gyrus	291
	R Temporal Fusiform Cortex, posterior division	284
	Left Amygdala	277
	L Frontal Orbital Cortex	250
	R Superior Parietal Lobule	248
	Right Amygdala	244
	L Postcentral Gyrus	212
	Left Putamen	193
	R Supracalcarine Cortex	189
	L Inferior Frontal Gyrus, pars triangularis	188
	L Juxtapositional Lobule Cortex	178
	L Inferior Frontal Gyrus, pars opercularis	174
	R Parahippocampal Gyrus, anterior division	162
	L Supramarginal Gyrus, anterior division	149
	L Insular Cortex	139
	R Paracingulate Gyrus	135
	L Parahippocampal Gyrus, anterior division	128
	L Parahippocampal Gyrus, posterior division	128
	R Superior Frontal Gyrus	115
	R Parahippocampal Gyrus, posterior division	115
	L Cingulate Gyrus, anterior division	87
	R Juxtapositional Lobule Cortex	77
	R Cingulate Gyrus, anterior division	74
	L Supracalcarine Cortex	71
	L Central Opercular Cortex	68
	R Angular Gyrus	60
	L Supramarginal Gyrus, posterior division	59
	L Inferior Temporal Gyrus, posterior division	58
	L Angular Gyrus	40
	Left Pallidum	34
	Right Putamen	19
2	R Middle Frontal Gyrus	1430	2506	36	-6	46	4.29
	R Precentral Gyrus	285
	R Inferior Frontal Gyrus, pars triangularis	44
	R Frontal Pole	32
	R Superior Frontal Gyrus	15
