# Supplementary material for: The hippocampus supports deliberation during value-based decisions
Source: eLife. 2019 Jul 3;8:e46080. doi: 10.7554/eLife.46080 (PMC6693920; doi:10.7554/eLife.46080)
Supplement: Figure 3—source data 4. [file elife-46080-fig3-data4.xlsx]

## Sheet: model003t1c2vt2c2_table
Cluster #	Region	# voxels in region	# voxels in cluster	x	y	z	peak Z
1	R Temporal Occipital Fusiform Cortex	491	4896	-30	-54	-6	5.41
	L Temporal Occipital Fusiform Cortex	476
	L Lingual Gyrus	430
	R Lingual Gyrus	409
	L Intracalcarine Cortex	357
	L Occipital Pole	295
	R Intracalcarine Cortex	291
	L Occipital Fusiform Gyrus	234
	L Temporal Fusiform Cortex, posterior division	198
	L Lateral Occipital Cortex, inferior division	165
	R Temporal Fusiform Cortex, posterior division	141
	R Precuneous Cortex	93
	R Occipital Fusiform Gyrus	89
	L Precuneous Cortex	58
	R Supracalcarine Cortex	55
	Right Hippocampus	34
	R Lateral Occipital Cortex, inferior division	29
	R Parahippocampal Gyrus, posterior division	29
	L Supracalcarine Cortex	25
	L Inferior Temporal Gyrus, temporooccipital part	24
	R Cuneal Cortex	19
	L Cuneal Cortex	12
	R Occipital Pole	12
