# Supplementary material for: The hippocampus supports deliberation during value-based decisions
Source: eLife. 2019 Jul 3;8:e46080. doi: 10.7554/eLife.46080 (PMC6693920; doi:10.7554/eLife.46080)
Supplement: Figure 3—source data 5. [file elife-46080-fig3-data5.xlsx]

## Sheet: model007task001cope014_table
Cluster #	Region	# voxels in region	# voxels in cluster	x	y	z	peak Z
1	R Lateral Occipital Cortex, superoir division	3072	55269	-36	-6	50	7
	L Lateral Occipital Cortex, superoir division	2846
	L Precentral Gyrus	2210
	L Postcentral Gyrus	1631
	R Frontal Pole	1446
	R Middle Frontal Gyrus	1388
	L Lateral Occipital Cortex, inferior division	1212
	R Superior Frontal Gyrus	1113
	L Occipital Pole	1108
	R Precentral Gyrus	1086
	L Middle Frontal Gyrus	1074
	R Lateral Occipital Cortex, inferior division	961
	L Superior Parietal Lobule	927
	R Precuneous Cortex	915
	L Occipital Fusiform Gyrus	838
	R Paracingulate Gyrus	824
	R Occipital Fusiform Gyrus	790
	Left Thalamus	775
	Brain-Stem	755
	L Frontal Pole	745
	R Lingual Gyrus	741
	R Temporal Occipital Fusiform Cortex	740
	L Superior Frontal Gyrus	689
	Right Thalamus	679
	R Cingulate Gyrus, anterior division	649
	R Superior Parietal Lobule	636
	R Occipital Pole	636
	L Precuneous Cortex	612
	R Intracalcarine Cortex	592
	L Temporal Occipital Fusiform Cortex	591
	R Juxtapositional Lobule Cortex	586
	L Supramarginal Gyrus, anterior division	581
	R Insular Cortex	568
	L Lingual Gyrus	550
	L Juxtapositional Lobule Cortex	537
	L Paracingulate Gyrus	533
	L Intracalcarine Cortex	517
	L Insular Cortex	485
	L Cingulate Gyrus, anterior division	475
	L Temporal Fusiform Cortex, posterior division	407
	R Inferior Temporal Gyrus, temporooccipital part	404
	L Inferior Temporal Gyrus, temporooccipital part	386
	R Inferior Frontal Gyrus, pars opercularis	302
	R Frontal Operculum Cortex	295
	L Frontal Operculum Cortex	265
	R Supramarginal Gyrus, posterior division	235
	R Supramarginal Gyrus, anterior division	232
	R Central Opercular Cortex	229
	L Supramarginal Gyrus, posterior division	226
	R Temporal Fusiform Cortex, posterior division	220
	R Angular Gyrus	197
	L Cuneal Cortex	196
	L Central Opercular Cortex	184
	R Frontal Orbital Cortex	179
	Left Hippocampus	177
	L Inferior Frontal Gyrus, pars opercularis	167
	R Cuneal Cortex	164
	Right Hippocampus	163
	L Inferior Frontal Gyrus, pars triangularis	126
	Left Caudate	123
	R Postcentral Gyrus	121
	R Parahippocampal Gyrus, anterior division	111
	R Inferior Frontal Gyrus, pars triangularis	100
	L Angular Gyrus	88
	Left Pallidum	73
	L Inferior Temporal Gyrus, posterior division	59
	L Frontal Orbital Cortex	57
	L Cingulate Gyrus, posterior division	56
	R Parahippocampal Gyrus, posterior division	53
	R Supracalcarine Cortex	51
	L Parahippocampal Gyrus, anterior division	47
	L Supracalcarine Cortex	40
	R Middle Temporal Gyrus, temporooccipital part	31
	Left Putamen	31
	R Cingulate Gyrus, posterior division	28
	Right Amygdala	28
	Left Amygdala	25
	L Middle Temporal Gyrus, temporooccipital part	22
	R Temporal Pole	22
	R Heschl's Gyrus (includes H1 and H2)	15
	L Parahippocampal Gyrus, posterior division	14
	R Temporal Fusiform Cortex, anterior division	12
	R Inferior Temporal Gyrus, posterior division	10
