# Supplementary material for: The hippocampus supports deliberation during value-based decisions
Source: eLife. 2019 Jul 3;8:e46080. doi: 10.7554/eLife.46080 (PMC6693920; doi:10.7554/eLife.46080)
Supplement: Figure 3—source data 6. [file elife-46080-fig3-data6.xlsx]

## Sheet: Supplementary_Table7.csv
Cluster #	Region	# voxels in region	# voxels in cluster	x	y	z	peak Z
1	L Precentral Gyrus	3111	54515	-40	-12	54	6.72
	R Lateral Occipital Cortex, superoir division	2731
	L Postcentral Gyrus	2545
	L Lateral Occipital Cortex, superoir division	2259
	R Precentral Gyrus	2108
	L Lateral Occipital Cortex, inferior division	1553
	R Lateral Occipital Cortex, inferior division	1496
	L Superior Parietal Lobule	1396
	R Postcentral Gyrus	1248
	R Superior Parietal Lobule	1200
	R Occipital Fusiform Gyrus	849
	L Occipital Fusiform Gyrus	843
	L Occipital Pole	818
	R Frontal Pole	771
	R Occipital Pole	746
	R Superior Frontal Gyrus	741
	R Juxtapositional Lobule Cortex	737
	R Cingulate Gyrus, anterior division	727
	L Middle Frontal Gyrus	723
	L Supramarginal Gyrus, anterior division	683
	R Supramarginal Gyrus, anterior division	680
	L Superior Frontal Gyrus	597
	L Juxtapositional Lobule Cortex	583
	R Middle Frontal Gyrus	560
	L Frontal Pole	552
	L Central Opercular Cortex	545
	R Paracingulate Gyrus	507
	Left Thalamus	458
	R Temporal Occipital Fusiform Cortex	449
	R Supramarginal Gyrus, posterior division	444
	R Insular Cortex	437
	Right Thalamus	433
	L Cingulate Gyrus, anterior division	430
	R Precuneous Cortex	417
	L Insular Cortex	410
	R Inferior Temporal Gyrus, temporooccipital part	381
	L Paracingulate Gyrus	380
	L Temporal Occipital Fusiform Cortex	369
	R Central Opercular Cortex	364
	L Parietal Operculum Cortex	351
	R Middle Temporal Gyrus, temporooccipital part	286
	L Supramarginal Gyrus, posterior division	277
	L Precuneous Cortex	253
	R Parietal Operculum Cortex	249
	R Frontal Operculum Cortex	246
	R Lingual Gyrus	244
	L Frontal Operculum Cortex	208
	L Inferior Temporal Gyrus, temporooccipital part	195
	R Inferior Frontal Gyrus, pars opercularis	193
	Brain-Stem	172
	L Cingulate Gyrus, posterior division	166
	L Planum Temporale	165
	L Lingual Gyrus	130
	R Cingulate Gyrus, posterior division	118
	Left Putamen	110
	L Heschl's Gyrus (includes H1 and H2)	91
	R Planum Temporale	85
	Right Hippocampus	85
	R Angular Gyrus	78
	L Intracalcarine Cortex	77
	R Heschl's Gyrus (includes H1 and H2)	75
	Right Pallidum	73
	R Cuneal Cortex	61
	L Middle Temporal Gyrus, temporooccipital part	56
	Left Hippocampus	55
	R Frontal Orbital Cortex	54
	L Temporal Fusiform Cortex, posterior division	48
	L Angular Gyrus	47
	Left Pallidum	46
	L Frontal Orbital Cortex	42
	R Temporal Fusiform Cortex, posterior division	41
	L Inferior Frontal Gyrus, pars opercularis	39
	L Planum Polare	36
	Right Putamen	34
	L Inferior Temporal Gyrus, posterior division	33
	R Inferior Frontal Gyrus, pars triangularis	30
	R Inferior Temporal Gyrus, posterior division	16
	L Inferior Frontal Gyrus, pars triangularis	13
	R Temporal Pole	13
