# Supplementary material for: The hippocampus supports deliberation during value-based decisions
Source: eLife. 2019 Jul 3;8:e46080. doi: 10.7554/eLife.46080 (PMC6693920; doi:10.7554/eLife.46080)
Supplement: Figure 3—source data 7. [file elife-46080-fig3-data7.xlsx]

## Sheet: model007_task001cope14_min_task
Cluster #	Region	# voxels in region	# voxels in cluster	x	y	z	peak Z
1	L Lateral Occipital Cortex, superoir division	2149	14697	36	-42	-16	5.5
	R Lateral Occipital Cortex, superoir division	1592
	R Temporal Occipital Fusiform Cortex	602
	L Occipital Fusiform Gyrus	581
	R Intracalcarine Cortex	526
	L Temporal Occipital Fusiform Cortex	492
	L Intracalcarine Cortex	473
	R Lingual Gyrus	436
	R Precuneous Cortex	432
	Left Thalamus	420
	L Occipital Pole	415
	R Occipital Fusiform Gyrus	412
	L Lingual Gyrus	371
	Brain-Stem	338
	L Lateral Occipital Cortex, inferior division	317
	L Precuneous Cortex	304
	Right Thalamus	298
	L Superior Parietal Lobule	258
	L Temporal Fusiform Cortex, posterior division	233
	R Lateral Occipital Cortex, inferior division	184
	R Temporal Fusiform Cortex, posterior division	121
	L Cuneal Cortex	118
	Right Hippocampus	116
	R Cuneal Cortex	95
	R Superior Parietal Lobule	90
	R Inferior Temporal Gyrus, temporooccipital part	89
	Left Hippocampus	88
	R Parahippocampal Gyrus, anterior division	82
	R Angular Gyrus	64
	L Inferior Temporal Gyrus, temporooccipital part	61
	R Occipital Pole	61
	R Supracalcarine Cortex	49
	L Supracalcarine Cortex	32
	R Parahippocampal Gyrus, posterior division	31
	L Supramarginal Gyrus, posterior division	18
	L Angular Gyrus	16
	L Parahippocampal Gyrus, posterior division	14
2	R Paracingulate Gyrus	681	4755	44	16	8	4.6
	R Middle Frontal Gyrus	631
	R Superior Frontal Gyrus	451
	L Paracingulate Gyrus	412
	R Insular Cortex	307
	R Frontal Operculum Cortex	269
	R Precentral Gyrus	208
	L Juxtapositional Lobule Cortex (formerly Supplementary Motor Cortex)	202
	R Juxtapositional Lobule Cortex (formerly Supplementary Motor Cortex)	147
	R Frontal Pole	121
	R Cingulate Gyrus, anterior division	111
	L Superior Frontal Gyrus	101
	R Inferior Frontal Gyrus, pars opercularis	94
	R Frontal Orbital Cortex	87
	L Cingulate Gyrus, anterior division	40
	R Inferior Frontal Gyrus, pars triangularis	23
	R Central Opercular Cortex	23
3	L Middle Frontal Gyrus	442	1809	-52	0	28	4.09
	L Frontal Operculum Cortex	238
	L Precentral Gyrus	233
	L Insular Cortex	205
	L Frontal Pole	107
	L Inferior Frontal Gyrus, pars triangularis	93
	L Inferior Frontal Gyrus, pars opercularis	58
	L Frontal Orbital Cortex	18
	L Central Opercular Cortex	11
4	L Precentral Gyrus	259	503	-36	-6	50	3.75
	L Middle Frontal Gyrus	161
	L Superior Frontal Gyrus	16
