# Supplementary material for: The hippocampus supports deliberation during value-based decisions
Source: eLife. 2019 Jul 3;8:e46080. doi: 10.7554/eLife.46080 (PMC6693920; doi:10.7554/eLife.46080)
Supplement: Figure 3—source data 8. [file elife-46080-fig3-data8.xlsx]

## Sheet: model007_task001cope14_min_task
Contrast	Cluster #	Region	# voxels in cluster	x	y	z	peak Z
VB RT	1	Right Hippocampus	66	20	-36	0	5.71
	2	Left Hippocampus	61	-18	-38	0	5.2
	3	Right Hippocampus	12	28	-4	-28	4.26
Perceptual RT	1	Right Hippocampus	39	20	-38	0	4.54
VB RT > Perceptual RT	1	Right Hippocampus	11	20	-34	-4	3.88
	2	Left Hippocampus	10	-18	-38	0	4.09
	3	Right Hippocampus	6	28	-10	-28	3.94
