# Supplementary material for: The hippocampus supports deliberation during value-based decisions
Source: eLife. 2019 Jul 3;8:e46080. doi: 10.7554/eLife.46080 (PMC6693920; doi:10.7554/eLife.46080)
Supplement: Figure 3—source data 9. [file elife-46080-fig3-data9.xlsx]

## Sheet: model007_task001cope14_min_task
Cluster #	Region	# voxels in region	# voxels in cluster	x	y	z	peak Z
1	L Lateral Occipital Cortex, superoir division	1683	13956	54	-38	44	4.69
	R Lateral Occipital Cortex, superoir division	1647
	R Precuneous Cortex	1621
	R Angular Gyrus	1176
	L Precuneous Cortex	1128
	R Cingulate Gyrus, posterior division	650
	R Supramarginal Gyrus, posterior division	629
	R Middle Temporal Gyrus, temporooccipital part	620
	L Cingulate Gyrus, posterior division	446
	L Supramarginal Gyrus, posterior division	406
	L Angular Gyrus	389
	L Superior Parietal Lobule	353
	R Superior Parietal Lobule	242
	R Supramarginal Gyrus, anterior division	229
	L Supramarginal Gyrus, anterior division	218
	R Lateral Occipital Cortex, inferior division	154
	R Cuneal Cortex	133
	R Middle Temporal Gyrus, posterior division	113
	R Intracalcarine Cortex	90
	R Inferior Temporal Gyrus, temporooccipital part	77
	L Intracalcarine Cortex	67
	L Cuneal Cortex	24
	R Postcentral Gyrus	19
	R Supracalcarine Cortex	14
2	R Middle Frontal Gyrus	1191	5592	-40	24	36	4.48
	L Middle Frontal Gyrus	1039
	R Superior Frontal Gyrus	363
	L Paracingulate Gyrus	352
	L Superior Frontal Gyrus	348
	R Paracingulate Gyrus	295
	Left Caudate	291
	Right Caudate	208
	L Cingulate Gyrus, anterior division	167
	R Cingulate Gyrus, anterior division	138
	L Insular Cortex	127
	R Frontal Pole	79
	Left Thalamus	47
	L Precentral Gyrus	43
	L Inferior Frontal Gyrus, pars opercularis	17
	R Precentral Gyrus	14
	Right Pallidum	14
	Left Accumbens	11
3	L Frontal Pole	583	635	-36	50	6	3.53
4	Right Thalamus	272	607	-10	-26	-8	3.56
	Brain-Stem	61
	Left Thalamus	40
	Left Hippocampus	32
