# Supplementary material for: The hippocampus supports deliberation during value-based decisions
Source: eLife. 2019 Jul 3;8:e46080. doi: 10.7554/eLife.46080 (PMC6693920; doi:10.7554/eLife.46080)
Supplement: Figure 4—source data 1. [file elife-46080-fig4-data1.xlsx]

## Sheet: model010_task001_cope011_table
Cluster #	Region	# voxels in region	# voxels in cluster	x	y	z	peak Z
1	R Superior Parietal Lobule	178	495	12	-48	54	3.69
	R Precuneous Cortex	143
	R Postcentral Gyrus	71
