# Supplementary material for: The hippocampus supports deliberation during value-based decisions
Source: eLife. 2019 Jul 3;8:e46080. doi: 10.7554/eLife.46080 (PMC6693920; doi:10.7554/eLife.46080)
Supplement: Figure 5—source data 1. — κ is the drift rate. B0 is the initial height of the bound. Bdel is the delay before the bound starts decreasing. B2 is the coefficient of the exponential term that governs the bound decrease. tnd is the non-decision time. σtnd is the standard deviation of the non-decision time. μ0 is the bias in drift rate. Plaw is the coefficient of the power law applied to the stimulus strength (color coherence for perceptual and ∆Value for value-based). NLL is negative log-likelihood of the parameters given the choice and RT data. R2 choices is the McFadden pseudo-R2 for choice data given color coherence (for perceptual) or ∆Value (for value-based). R2 RT is the R2 for RT data given color coherence (for perceptual) or ∆Value (for value-based). [file elife-46080-fig5-data1.xlsx]

## Sheet: Supplementary_Table1.csv
	Group	Participant #	κ	B0	Bdel	B2	tnd	σtnd	μ0	Plaw	NLL	R2 choices	R2 RT
Perceptual Decisions	Older healthy participants	ALL O	1.49203	0.908288	1.58999	0.602546	0.567734	0.12728	0.0940158	0.811212	25060	0.3213	0.118609
		O01	1.67265	1.72166	0.593384	0.971205	0.300526	0.003107	0.070159	0.82867	1753.6	0.3543	0.256995
		O02	1.28647	1.11696	0.33943	1.64257	0.300649	0.00136	0.246509	1.1056	1657.66	0.2971	0.207245
		O03	2.46689	1.26552	0.390508	1.39843	0.547038	0.077194	0.021152	0.949841	1637.78	0.5117	0.399342
		O04	1.82914	1.21169	0.325692	0.641282	0.409561	0.058461	-0.119826	1.02747	1712.45	0.4027	0.246829
		O05	1.09352	0.720728	1.18321	0.735533	0.662066	0.138883	0.542718	1.27375	1763.35	0.183	0.0456821
		O06	2.22036	1.24768	0.330871	1.31846	0.515901	0.001482	-0.170057	0.847482	1624.13	0.5188	0.307287
		O07	0.87308	1.13269	1.99089	1.46839	0.655019	0.04394	0.255513	1.24848	1758.94	0.2847	0.100921
		O08	0.796981	2.66207	0.662715	0.984837	0.491639	0.119413	0.371991	0.940037	1773.82	0.2883	0.17359
		O09	1.6238	1.09864	0.954488	0.372251	0.447389	0.099816	0.013224	0.893024	1775.49	0.4752	0.18248
		O10	2.47996	0.797527	0.930408	1.11555	0.766501	0.062879	0.215934	1.39644	1722.99	0.2016	0.158155
		O11	2.31343	0.881994	2.04738	2.2446	0.447435	0.031298	-0.002236	0.817411	1697.63	0.4262	0.195201
		O12	2.03509	1.43092	0.608935	0.844598	0.515005	0.079742	0.141656	1.03223	1750.97	0.3968	0.306962
		O13	2.02921	0.799306	1.1524	0.518885	0.593861	0.075216	-0.057534	1.35039	1753.64	0.2016	0.110129
		O14	3.48689	0.880823	0.56482	0.523399	0.652867	0.108151	0.022932	1.24499	1687.64	0.4673	0.267586
	Amnesic patients	ALL P	1.44646	0.802096	2.41506	1.88985	0.594899	0.139353	0.204917	0.825917	10612.6	0.2665	0.0929878
		P01	0.967348	0.828693	2.52494	2.99999	0.547379	0.132902	0.378718	0.778286	1771.78	0.1558	0.0556345
		P02	0.937573	1.29386	0.703149	2.12455	0.458653	0.112474	-0.018342	0.776484	1758.1	0.1768	0.100544
		P03	1.92853	0.936352	1.60616	0.362313	0.502712	0.066642	0.143793	1.0025	1728.55	0.4036	0.196932
		P04	0.995524	0.949572	1.9174	0.875384	0.363051	0.073396	0.111377	0.78254	1798.76	0.1883	0.0849441
		P05	3.85782	0.725469	1.67171	1.20059	0.674017	0.086442	0.159048	0.70206	1642.11	0.4681	0.201748
		P06	1.91038	0.988604	0.463894	2.03807	0.563715	0.035241	0.324731	1.02191	1657.65	0.4156	0.20582
Value-based Decisions	Older healthy participants	ALL O	1.10938	0.845388	1.47195	0.427972	0.644784	0.120127	-0.0367208	0.835974	24342.7	0.4074	0.0630188
		O01	1.27334	0.879628	0.58851	6.4e-05	0.636674	0.060506	0.151514	0.926242	1711.87	0.5235	0.108213
		O02	1.28158	0.715208	1.70195	0.016413	0.756018	0.091081	-0.07486	1.01251	1692.85	0.4163	0.141571
		O03	0.949687	0.95248	0.918244	0.969414	0.568074	0.049366	0.028441	1.178	1746.98	0.3743	0.132678
		O04	1.59061	0.783205	1.42128	0.000713	0.728892	0.115233	-0.2	0.746713	1704.86	0.5458	0.0431824
		O05	0.838716	1.25725	0.537968	0.767015	0.360358	0.031262	-0.199696	0.937529	1757.62	0.4194	0.0718355
		O06	1.01611	1.13222	0.953011	0.300333	0.599791	0.097064	0.031648	1.2015	1783.2	0.5673	0.131603
		O07	1.19319	0.965645	0.311375	0.454366	0.684342	0.083517	0.001942	0.706973	1753.4	0.3203	0.0272496
		O08	1.55333	0.885828	0.735666	0.219968	0.792486	0.138745	-0.040838	0.887565	1381.25	0.5574	0.107642
		O09	0.849338	0.635005	0.411269	0.22063	0.629187	0.136501	0.073436	1.14899	1727.43	0.2206	0.0638587
		O10	0.896724	0.551979	1.91648	0.026369	0.662134	0.09832	-0.2	0.979062	1685.14	0.2111	0.0284983
		O11	1.23256	0.850641	2.88605	3.1e-05	0.494157	0.001	-0.2	0.720217	1738.75	0.3899	0.0472089
		O12	0.946607	1.15407	0.040546	0.232647	0.996538	0.187073	0.163845	0.955379	1769.01	0.5312	0.0927266
		O13	1.23438	0.739495	1.02842	0.015648	0.724063	0.134992	0.064085	0.951337	1716.57	0.4161	0.122125
		O14	1.59664	0.936714	1.42021	0.012939	0.640583	0.067778	-0.021785	0.902308	1702.01	0.5679	0.231264
	Amnesic patients	ALL P	0.582892	1.29008	0.266539	0.339604	0.660911	0.133737	-0.0237552	0.809159	9935.26	0.2208	0.0167668
		P01	0.598087	1.01231	0.742605	2.07927e-09	0.836034	0.073204	0.015395	1.19994	1502.96	0.3534	0.0333542
		P02	0.382812	1.13022	0.158548	0.347258	0.747871	0.141947	-0.169407	0.981978	1497.74	0.1024	0.0149968
		P03	0.488642	1.38783	0.00187	0.481574	0.692121	0.122441	0.125974	0.906998	1829.3	0.1776	0.0189242
		P04	0.555304	1.40896	0.523337	0.413934	0.750261	0.158534	-0.07334	0.893936	1816.22	0.2884	0.0225678
		P05	0.350509	1.00428	0.260015	0.207662	0.960567	0.066999	0.199515	1.34301	1360.24	0.1249	0.0189366
		P06	0.753867	0.962882	0.864097	5.72482e-06	0.678245	0.076193	0.006785	1.22507	1847.93	0.3358	0.082966
